# Supplementary material for: A multifunctional hollow TPU fiber filled with liquid metal exhibiting fast electrothermal deformation and recovery
Source: Royal Society of Chemistry journal article supplement (doi:10.1039/d1sm01189h), 2021-01-01
Supplement: d1sm01189h1.pdf [file d1sm01189h1.pdf]

## Supplementary information

### Multifunctional hollow TPU fiber filled with liquid metal exhibiting fast electrothermal deformation and recovery

Yan Xiong,<sup>ab</sup> Jieyu Xiao,<sup>ab</sup> Juan Chen,<sup>ab</sup> Da Xu,<sup>ab</sup> ShanShan Zhao,<sup>ab</sup> Shangbi Chen,<sup>abcd</sup> Bin Sheng<sup>\*ab</sup>

a School of Optical Electrical and Computer Engineering, University of Shanghai for Science and Technology, Shanghai 200093, China.

b Shanghai Key Laboratory of Modern Optical Systems, Engineering Research Center of Optical Instruments and Systems, Shanghai 200093, China

c Shanghai Aerospace Control Technology Institute, Shanghai 200233, China

d Shanghai Xin Yue Lian Hui Electronic Technology Co. LTD, Shanghai 200233, China

\*Corresponding Author.

E-mail address: bsheng@usst.edu.cn. (B. Sheng).

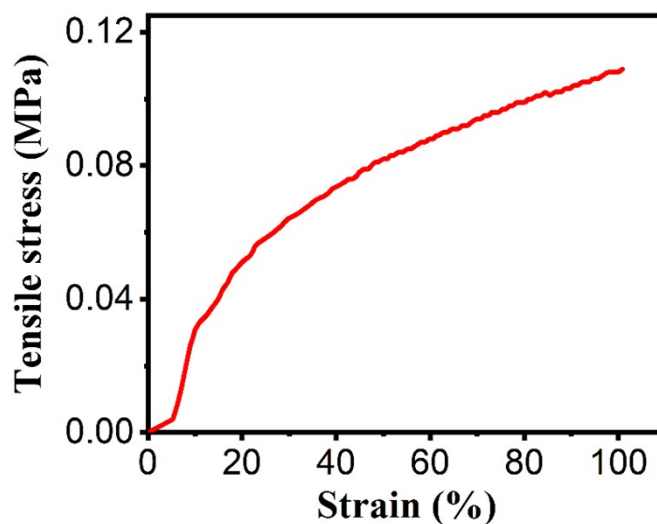

**Fig. S1** The tensile stress–strain plots of DCF at 100% strain. DCF cannot recover after stretching more than 100%.

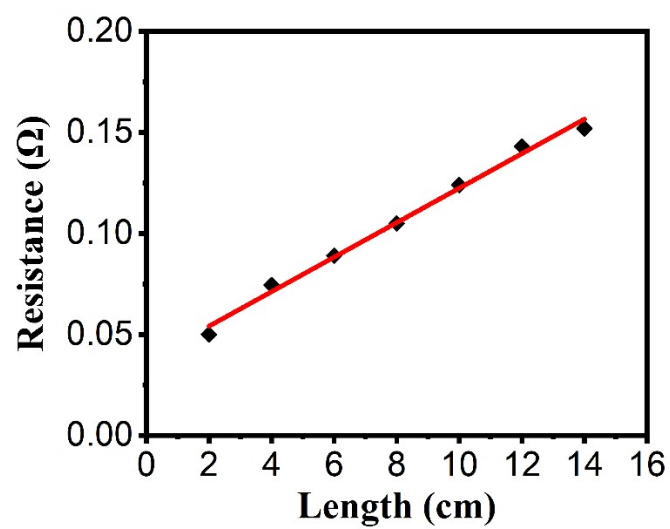

**Fig. S2** The resistance of DCF increases linearly with its length.

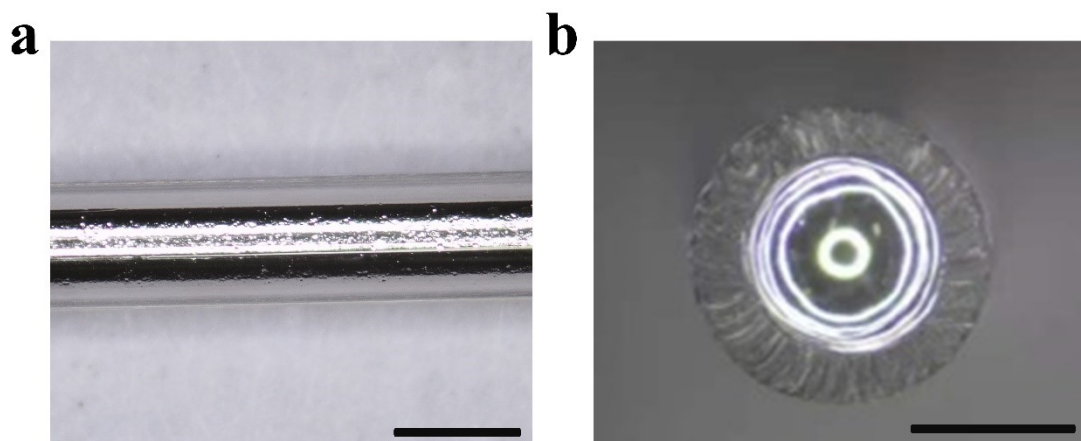

**Fig. S3** Optical micrograph of DCF. (a) Optical image of the axial of DCF. Scale bar represents 1 mm. (b) Optical image of the cross-section of DCF. Scale bar represents 0.5 mm.

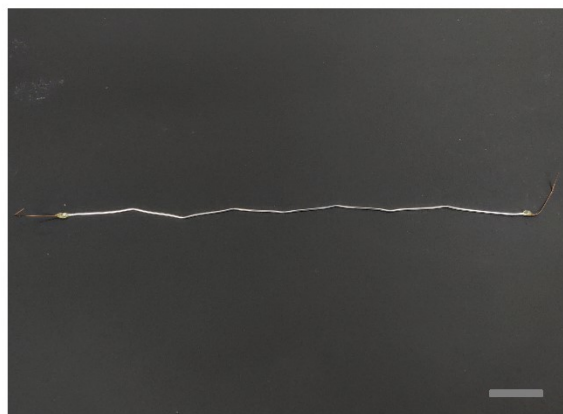

**Fig. S4** Photographs of wave shape DCF being shaped back to initial shape. Scale bar represents 3 cm.

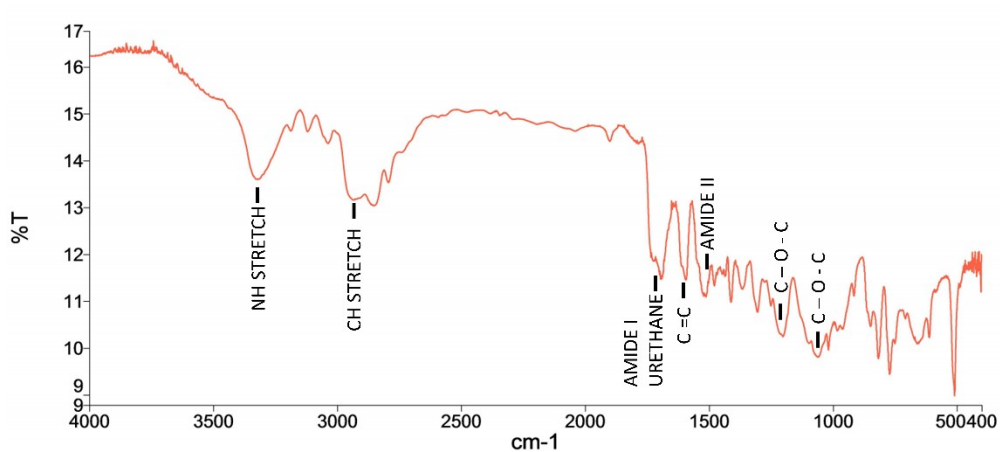

**Fig. S5** Fourier infrared spectrum transmission curve of thermoplastic polyurethane.

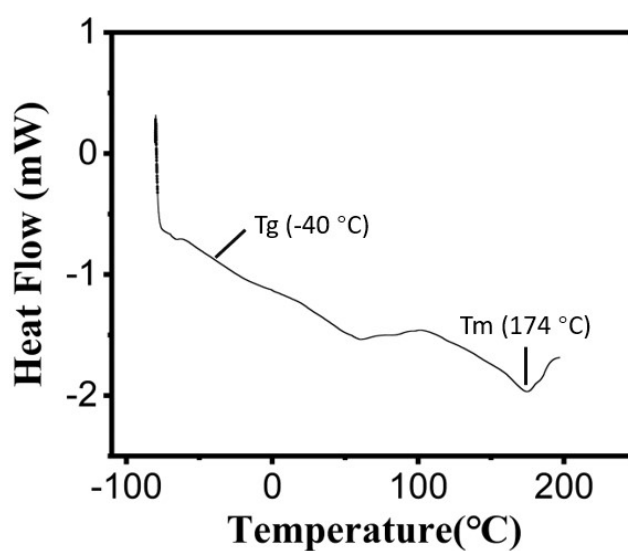

**Fig. S6** The DSC graph of thermoplastic polyurethane.

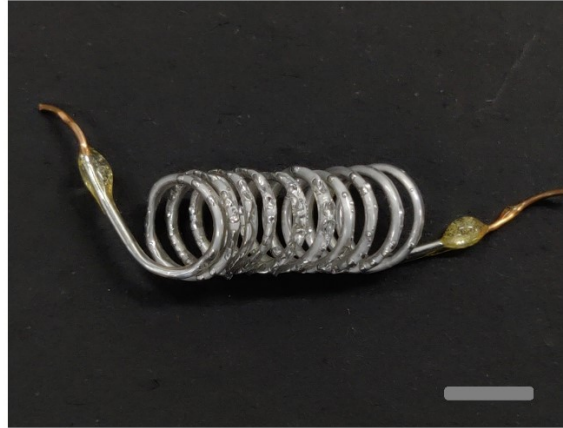

**Fig. S7** Photos of damaged DCF after being heated to 190 °C. Scale bar represents 5 mm.

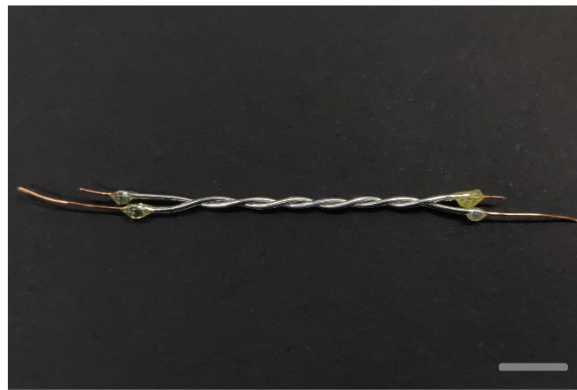

**Fig. S8** Photographs of double-torsional shape DCF. Scale bar represents 1 cm.

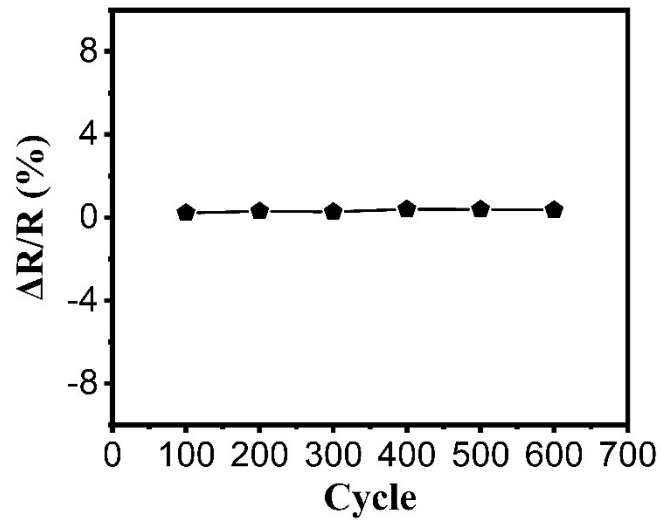

**Fig. S9** Repeatability characterization of the helical DCF at 500% strain (with a C of 6).

**Table 1. Correspondence between k value and  $D/L_0$**

|         |      |      |      |      |      |      |      |      |      |
|---------|------|------|------|------|------|------|------|------|------|
| $D/L_0$ | 0.1  | 0.2  | 0.4  | 0.6  | 0.75 | 1.0  | 1.5  | 2.0  | 3.0  |
| k       | 0.96 | 0.92 | 0.85 | 0.79 | 0.7  | 0.69 | 0.60 | 0.52 | 0.43 |
